# Supplementary material for: Intertidal fishes of Mauritius with special reference to shallow tidepools
Source: Biodivers Data J. 2019 Aug 6;7:e36754. doi: 10.3897/BDJ.7.e36754 (PMC6692306; doi:10.3897/BDJ.7.e36754)
Supplement: Supplementary material 1 — Tidepool characteristics [file bdj-07-e36754-s001.xlsx]

## Sheet: Suppl Tab 2
	BB1	BB2	BB3	BB4	BB5	BB6	BB7	ALD1	ALD2	ALD3	ALD4	ALD5	ALD6	ALG7	ALG8	ALG9	ALG10	ALG11	LH1	LH2	PE1	PE2	PE3
Ao_ebb	15	4	3	1	0.8	1.5	2	30	6	6	20	10	40	35	16	30	22	45	30	28	54	36	40
Ao_flow	36	9	5	4	4	5	5	35	10	10	25	15	45	40	22	36	40	50	30	28	75	50	60
Depth	25	10	10	10	10	15	15	50	25	30	30	50	40	40	30	25	30	30	60	100	25	20	15
Isolation	10	50	50	50	50	0	50	50	70	70	0	50	60	10	67	0	0	90	100	100	20	30	50
S_sand	80	60	70	20	60	60	50	10	10	30	0	0	20	60	20	55	50	50	0	0	80	90	70
S_stone	20	30	15	30	40	40	30	90	50	20	100	100	80	35	80	40	50	50	70	70	20	10	30
S_algae	0	10	15	50	0	0	20	0	40	50	0	0	0	2.5	0	0	0	0	30	30	40	10	15
S_Boulders	10	0	0	0	15	10	20	25	0	0	10	0	15	20	25	10	25	0	40	20	0	0	0
Latitude S	20°26'44.92''S	20°26'44.82''S	20°26'44.85''S	20°26'44.71''S	20°26'44.76''S	20°26'44.71''S	20°26'44.76''S	20°11'46.17''S	20°11'46.64''S	20°11'46.87''S	20°11'47.25''S	20°11'47.77''S	20°11'47.87''S	20°11'53.39''S	20°11'52.98''S	20°11'52.84''S	20°11'52.43''S	20°11'54.05''S	20°11'27.64''S	20°11'27.74''S	19°59'15.33''S	19°59'15.10''S	19°59'14.70''S
Longitude E	57°42'59.8''E	57°43'00.39''E	57°43'00.53''E	57°43'00.63''E	57°43'00.69''E	57°43'00.94''E	57°43'01.21''E	57°24'24.41''E	57°24'24''E	57°24'23.83''E	57°24'23.48''E	57°24'22.94''E	57°24'22.71''E	57°24'15.04''E	57°24'15.75'E	57°24'16.08''E	57°24'16.66''E	57°24'13.91''E	57°24'41.39''E	57°24'41.08''E	57°35'47.09''E	57°35'47.11''E	57°35'47.31''E
