# Supplementary material for: Intertidal fishes of Mauritius with special reference to shallow tidepools
Source: Biodivers Data J. 2019 Aug 6;7:e36754. doi: 10.3897/BDJ.7.e36754 (PMC6692306; doi:10.3897/BDJ.7.e36754)
Supplement: Supplementary material 2 — Recorded permament intertidal resident fish species in shallow tidepools of Mauritius [file bdj-07-e36754-s002.xlsx]

## Sheet: Suppl Tab 1
	BB1	BB2	BB3	BB4	BB5	BB6	BB7	ALD1	ALD2	ALD3	ALD4	ALD5	ALD6	ALG7	ALG8	ALG9	ALG10	ALG11	LH1	LH2	PE1	PE2	PE3
Bathygobius coalitus	6	12	9	5	3	3	10	9	18	2	0	3	12	4	1	0	0	9	9	11	2	4	2
Istiblennius edentulus	36	2	1	4	1	5	6	30	6	15	10	10	12	4	12	3	5	0	18	8	6	2	2
Istiblennius dussumieri	1	0	0	0	0	0	0	0	0	0	0	0	0	0	0	0	0	0	0	0	0	0	0
Istiblennius bellus	0	0	0	0	0	0	0	18	0	15	18	9	10	8	3	4	4	0	6	17	0	0	0
Alticus monochrus	0	0	0	0	0	0	0	3	0	0	2	1	2	2	0	2	1	0	0	0	0	0	0
Blenniella cf. periophthalmus	0	0	0	0	0	0	0	0	0	0	0	0	0	2	1	0	0	0	0	0	0	0	0
Echidna nebulosa	0	0	0	0	0	0	0	0	0	0	0	0	0	1	0	1	0	0	0	0	0	0	0
Stegastes limbatus	1	0	0	0	0	0	0	0	0	0	0	0	1	2	0	0	0	0	0	0	0	0	0
Sum of species	4	2	2	2	2	2	2	4	2	3	3	4	5	7	4	4	3	1	3	3	2	2	2
Sum of individuals	44	14	10	9	4	8	16	60	24	32	30	23	37	23	17	10	10	9	33	36	8	6	4
Brillouin's Index	0.523	0.322	0.230	0.537	0.347	0.503	0.562	1.05	0.492	0.783	0.749	0.953	1.177	1.416	0.689	0.944	0.714	0	0.887	0.947	0.416	0.451	0.448
Evenness (after Buzas & Gibson)	0.459	0.753	0.692	0.994	0.877	0.969	0.969	0.783	0.877	0.806	0.782	0.775	0.763	0.821	0.605	0.899	0.856	1	0.901	0.953	0.877	0.944	1
